# Supplementary material for: Uncovering the Nutritive Profiles of Adult Male Chinese Mitten Crab (E. sinensis) Harvested from the Pond and Natural Water Area of Qin Lake Based on Metabolomics
Source: MDPI journal article supplement (doi:10.3390/foods12112178), 2023-05-29
Supplement: s1 [file s1]

## **Supplementary Materials**

### **Uncovering the nutritive profiles of adult male Chinese mitten crab (*E. sinensis*) harvested from the pond and natural water area of Qin Lake based on metabolomics**

Yuhui Ye<sup>1</sup>, Yulong Wang<sup>1</sup>, Pengyan Liu<sup>1</sup>, Jian Chen<sup>1</sup>, Cunzheng Zhang<sup>1\*</sup>

<sup>1</sup>Jiangsu Key Laboratory for Food Quality and Safety-State Key Laboratory Cultivation  
Base of Ministry of Science and Technology, Institute of Food Safety and Nutrition,  
Jiangsu Academy of Agricultural Sciences, Nanjing 210014, China

## Figure legends

A

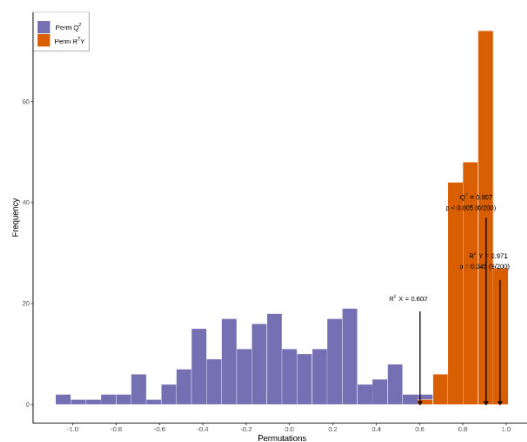

B

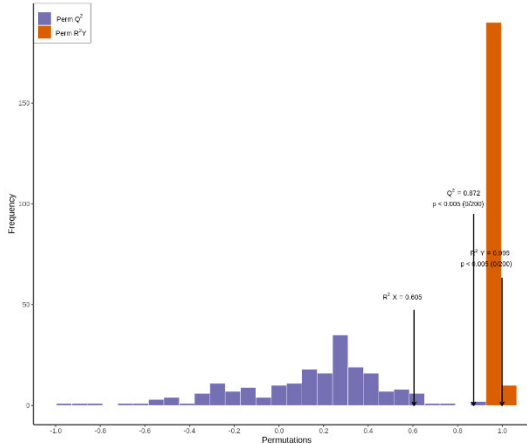

C

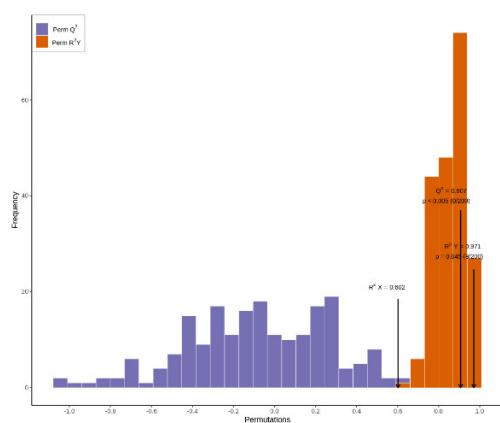

D

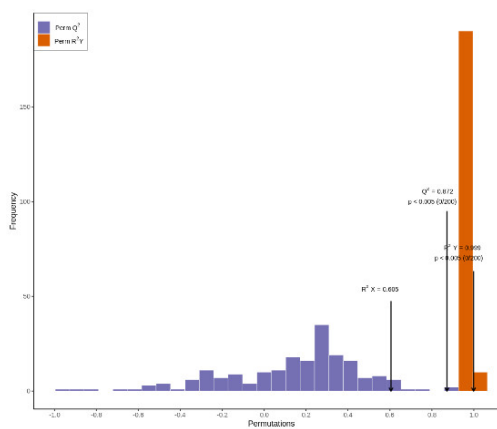

**Figure S1.** The OPLS-Permutation plot of the comparisons between N-M10 and P-M10 (A); N-M11 and P-M11 (B); N-M10 and N-M11 (C); P-M10 and P-M11 (D)

**Table S1 The proximate composition of the meat and cream of *E. sinensis***

| <b>Meat</b>                |                          |                          |                          |                         |
|----------------------------|--------------------------|--------------------------|--------------------------|-------------------------|
|                            | <b>N-M10</b>             | <b>P-M10</b>             | <b>N-M11</b>             | <b>P-M11</b>            |
| <b>Water content (%)</b>   | 79.96 ±1.49 <sup>a</sup> | 80.18±1.19 <sup>a</sup>  | 80.47±1.95 <sup>a</sup>  | 79.05±1.65 <sup>a</sup> |
| <b>Protein content (%)</b> | 15.31±0.93 <sup>b</sup>  | 17.74±1.12 <sup>ab</sup> | 17.45±1.33 <sup>ab</sup> | 18.68±0.99 <sup>a</sup> |
| <b>Fat content (%)</b>     | 2.67±1.19 <sup>b</sup>   | 4.37±0.53 <sup>a</sup>   | 5.40±0.43 <sup>a</sup>   | 4.64±0.30 <sup>a</sup>  |
| <b>Ash content (%)</b>     | 2.12±0.44 <sup>b</sup>   | 1.71±0.47 <sup>b</sup>   | 1.49±0.50 <sup>b</sup>   | 2.86±0.33 <sup>a</sup>  |
| <b>Cream</b>               |                          |                          |                          |                         |
| <b>Water content (%)</b>   | 57.19±1.32 <sup>B</sup>  | 63.14±1.38 <sup>A</sup>  | 62.16±0.92 <sup>A</sup>  | 65.30±1.81 <sup>A</sup> |
| <b>Protein content (%)</b> | 8.11±0.84 <sup>B</sup>   | 9.70±1.26 <sup>A</sup>   | 9.60±1.27 <sup>A</sup>   | 10.65±1.01 <sup>A</sup> |
| <b>Fat content (%)</b>     | 38.85±1.19 <sup>A</sup>  | 38.85±1.28 <sup>A</sup>  | 28.52±1.13 <sup>B</sup>  | 38.19±0.43 <sup>A</sup> |
| <b>Ash content (%)</b>     | 1.37±0.31 <sup>B</sup>   | 1.97±0.35 <sup>A</sup>   | 1.37±0.30 <sup>B</sup>   | 1.48±0.24 <sup>B</sup>  |

Letters with the lower case mark the significant difference of each line of the meat samples ( $P<0.05$ ); Letters with the upper case mark the significant difference of each line of the cream samples ( $P<0.05$ ).
